# Supplementary material for: Fairness-enhancing classification methods for non-binary sensitive features—How to fairly detect leakages in water distribution systems
Source: PubMed Central journal article supplement (PMC11623278; doi:10.7717/peerj-cs.2317), 2024-09-30
Supplement: peerj-cs-10-2317-s001.pdf [file peerj-cs-10-2317-s001.pdf]

# 1284 A Additional Proofs

## 1285 A.1 Sigma-Fields

1286 **Lemma A.1** ( $\sigma$ -field induced by a set system).

1287 *Let  $\Omega$  be a set and  $\mathcal{E} \subset P(\Omega)$  some set system of  $\Omega$ . Then the set system*

$$1288 \quad \sigma(\mathcal{E}) := \bigcap_{\substack{\mathcal{F} \text{ is } \sigma\text{-field on } \Omega, \\ \mathcal{E} \subset \mathcal{F}}} \mathcal{F}$$

1289 *defines the smallest  $\sigma$ -field on  $\Omega$  that holds  $\mathcal{E}$ , called the  $\sigma$ -field generated by  $\mathcal{E}$ .*

1290 *Proof.* This is trivial. □

1291 *Remark A.2.* For the set system  $\mathcal{E} \subset P(\Omega)$  of  $\Omega$ ,  $\mathcal{E} \subset \sigma(\mathcal{E})$  holds. If the set system  
 1292  $\mathcal{E} \subset P(\Omega)$  is a  $\sigma$ -field on  $\Omega$  already,  $\sigma(\mathcal{E}) = \mathcal{E}$  holds: All  $\sigma$ -fields  $\mathcal{F}$  on  $\Omega$  considered in  
 1293 the intersection satisfy  $\mathcal{E} \subset \mathcal{F}$ . Therefore,  $\mathcal{E} \subset \bigcap_{\mathcal{E} \subset \mathcal{F}} \mathcal{F}$  holds. If  $\mathcal{E}$  is a  
 1294  $\sigma$ -field already,  $\mathcal{E}$  is one of these  $\sigma$ -fields on  $\Omega$  that satisfy  $\mathcal{E} \subset \mathcal{E}$ . Therefore, in this case,  
 1295  $\bigcap_{\mathcal{E} \subset \mathcal{F}} \mathcal{F} \subset \mathcal{E}$  also holds.

1296 *Remark A.3.* If for two set systems  $\mathcal{E}_1, \mathcal{E}_2 \subset P(\Omega)$  of  $\Omega$ ,  $\mathcal{E}_1 \subset \mathcal{E}_2$  holds,  $\sigma(\mathcal{E}_1) \subset \sigma(\mathcal{E}_2)$   
 1297 holds: All  $\sigma$ -fields that hold  $\mathcal{E}_2$  also hold  $\mathcal{E}_1$ . Therefore, the intersection over all  $\sigma$ -fields  
 1298 that hold  $\mathcal{E}_1$  creates an equal or smaller set system compared to the intersection over all  
 1299  $\sigma$ -fields that hold  $\mathcal{E}_2$ .

1300 **Lemma A.4** ( $\sigma$ -field induced by a function).

1301 *Let  $X : \Omega \rightarrow \mathcal{X}$  be a function with  $\sigma$ -field  $\mathcal{F}_{\mathcal{X}}$  on  $\mathcal{X}$ . Then the set system  $\sigma(X) :=$   
 1302  $X^{-1}(\mathcal{F}_{\mathcal{X}}) = \{X^{-1}(A) \subset \Omega \mid A \in \mathcal{F}_{\mathcal{X}}\}$  of  $\Omega$  defines a  $\sigma$ -field on  $\Omega$ , called the  $\sigma$ -field  
 1303 generated by  $X$ .*

1304 *Proof.* (i)  $\Omega \in \sigma(X)$ : By definition of a  $\sigma$ -field on  $\mathcal{X}$ ,  $\mathcal{X} \in \mathcal{F}_{\mathcal{X}}$  holds. Thus, by definition  
 1305 of  $\sigma(X)$ ,  $\Omega = X^{-1}(\mathcal{X}) \in \sigma(X)$  holds.

1306 (ii) If  $B \in \sigma(X)$ ,  $B^C \in \sigma(X)$ , too: If  $B \in \sigma(X)$ , by definition of  $\sigma(X)$ , there exists  
 1307 an  $A \in \mathcal{F}_{\mathcal{X}}$ , such that  $B = X^{-1}(A)$  holds. By definition of a  $\sigma$ -field,  $A^C \in \mathcal{F}_{\mathcal{X}}$  holds.  
 1308 Thus, by definition of  $\sigma(X)$ ,  $B^C = (X^{-1}(A))^C = X^{-1}(A^C) \in \sigma(X)$  holds.

1309 (iii) If  $B_n \in \sigma(X)$  for all  $n \in \mathbb{N}$ ,  $\bigcup_{n \in \mathbb{N}} B_n \in \sigma(X)$ , too: If  $B_n \in \sigma(X)$ , by def-  
 1310 inition of  $\sigma(X)$ , there exists an  $A_n \in \mathcal{F}_{\mathcal{X}}$ , such that  $B_n = X^{-1}(A_n)$  holds for all  
 1311  $n \in \mathbb{N}$ . By definition of a  $\sigma$ -field,  $\bigcup_{n \in \mathbb{N}} A_n \in \mathcal{F}_{\mathcal{X}}$  holds. Thus, by definition of  $\sigma(X)$ ,  
 1312  $\bigcup_{n \in \mathbb{N}} B_n = \bigcup_{n \in \mathbb{N}} X^{-1}(A_n) = X^{-1}(\bigcup_{n \in \mathbb{N}} A_n) \in \sigma(X)$  holds. □

1315 **Lemma A.5** ( $\sigma$ -field induced by a set system and a function).

1316 *Let  $X : \Omega \rightarrow \mathcal{X}$  be a function and  $\mathcal{E} \subset P(\mathcal{X})$  some set system of  $\mathcal{X}$ . Then  $X^{-1}(\sigma(\mathcal{E})) =$   
 1317  $\sigma(X^{-1}(\mathcal{E}))$  holds.*

1318 *Proof.* (i)  $\sigma(X^{-1}(\mathcal{E})) \subset X^{-1}(\sigma(\mathcal{E}))$ : By remark A.3,  $X^{-1}(\mathcal{E}) \subset X^{-1}(\sigma(\mathcal{E}))$  implies  
 1319  $\sigma(X^{-1}(\mathcal{E})) \subset \sigma(X^{-1}(\sigma(\mathcal{E})))$ . By lemma A.4 for  $\mathcal{F}_{\mathcal{X}} = \sigma(\mathcal{E})$ ,  $X^{-1}(\sigma(\mathcal{E}))$  is a  $\sigma$ -field on  $\Omega$ .  
 1320 Thus, by remark A.2,  $\sigma(X^{-1}(\mathcal{E})) \subset \sigma(X^{-1}(\sigma(\mathcal{E}))) = X^{-1}(\sigma(\mathcal{E}))$  holds.

1321 (ii)  $X^{-1}(\sigma(\mathcal{E})) \subset \sigma(X^{-1}(\mathcal{E}))$ : By definition of  $X^{-1}(\sigma(\mathcal{E}))$ , we need to show that for  
 1322 all  $A \in \sigma(\mathcal{E})$ ,  $X^{-1}(A) \in \sigma(X^{-1}(\mathcal{E}))$  holds. We do so by using the principle of good sets:  
 1323

1324 Let  $\mathcal{G} := \{A \subset \mathcal{X} \mid X^{-1}(A) \in \sigma(X^{-1}(\mathcal{E}))\}$ . The goal is to show that  $\sigma(\mathcal{E}) \subset \mathcal{G}$  holds.

1325

1326 (ii.1)  $\mathcal{E} \subset \mathcal{G}$ : If  $A \in \mathcal{E}$ , by definition of  $X^{-1}(\mathcal{E})$  and remark A.2,  $X^{-1}(A) \in X^{-1}(\mathcal{E}) \subset$   
 1327  $\sigma(X^{-1}(\mathcal{E}))$  holds. Thus,  $A \in \mathcal{G}$  holds.

1328

1329 (ii.2)  $\mathcal{G}$  is a  $\sigma$ -field on  $\mathcal{X}$ :

1330 (ii.2.i)  $\mathcal{X} \in \mathcal{G}$ : By definition of a  $\sigma$ -field on  $\Omega$ ,  $X^{-1}(\mathcal{X}) = \Omega \in \sigma(X^{-1}(\mathcal{E}))$  holds. Thus, by  
 1331 definition of  $\mathcal{G}$ ,  $\mathcal{X} \in \mathcal{G}$  holds.

1332

1333 (ii.2.ii) If  $A \in \mathcal{G}$ ,  $A^C \in \mathcal{G}$ , too: If  $A \in \mathcal{G}$ , by definition of  $\mathcal{G}$ ,  $X^{-1}(A) \in \sigma(X^{-1}(\mathcal{E}))$   
 1334 holds. By definition of a  $\sigma$ -field,  $X^{-1}(A^C) = (X^{-1}(A))^C \in \sigma(X^{-1}(\mathcal{E}))$  holds. Thus, by  
 1335 definition of  $\mathcal{G}$ ,  $A^C \in \mathcal{G}$  holds.

1336

1337 (ii.2.iii) If  $A_n \in \mathcal{G}$  for all  $n \in \mathbb{N}$ ,  $\cup_{n \in \mathbb{N}} A_n \in \mathcal{G}$ , too: If  $A_n \in \mathcal{G}$ , by definition of  $\mathcal{G}$ ,  
 1338  $X^{-1}(A_n) \in \sigma(X^{-1}(\mathcal{E}))$  holds for all  $n \in \mathbb{N}$ . By definition of a  $\sigma$ -field,  $X^{-1}(\cup_{n \in \mathbb{N}} A_n) =$   
 1339  $\cup_{n \in \mathbb{N}} X^{-1}(A_n) \in \sigma(X^{-1}(\mathcal{E}))$  holds. Thus, by definition of  $\mathcal{G}$ ,  $\cup_{n \in \mathbb{N}} A_n \in \mathcal{G}$  holds.

1340

1341 Finally, as  $\mathcal{E} \subset \mathcal{G}$  and  $\mathcal{G}$  is a  $\sigma$ -field on  $\mathcal{X}$ , by remark A.3 and A.2,  $\sigma(\mathcal{E}) \subset \sigma(\mathcal{G}) = \mathcal{G}$   
 1342 holds, which was the goal to show.  $\square$

1343 *Remark A.6.* If in lemma A.4, the generator of  $\mathcal{F}_{\mathcal{X}}$  is known, i.e., if  $\mathcal{F}_{\mathcal{X}} = \sigma(\mathcal{E}_{\mathcal{X}})$  holds,  
 1344 using the notation from lemma A.5 with  $\mathcal{E} = \mathcal{E}_{\mathcal{X}}$ , we obtain

$$1345 \quad \sigma(X) := X^{-1}(\mathcal{F}_{\mathcal{X}}) = X^{-1}(\sigma(\mathcal{E}_{\mathcal{X}})) = \sigma(X^{-1}(\mathcal{E}_{\mathcal{X}})),$$

1346 i.e., the  $\sigma$ -field generated by the function  $X$  equals the  $\sigma$ -field generated by the pre-image  
 1347 of the generator  $\mathcal{E}_{\mathcal{X}}$  of the  $\sigma$ -field  $\mathcal{F}_{\mathcal{X}}$ .

## 1348 A.2 Independence of Two Random Variables

1349 **Lemma A.7** (Independence of two random variables, version 1).

1350  *$X$  and  $Y$  are independent with respect to  $\mathbb{P}$  iff*

$$1351 \quad \mathbb{P}(X \in A, Y \in B) = \mathbb{P}(X \in A) \cdot \mathbb{P}(Y \in B) \quad (\text{A.11})$$

1352 *holds for all  $A \in \mathcal{F}_{\mathcal{X}}, B \in \mathcal{F}_{\mathcal{Y}}$ .*

1353 *Proof.* By definition of  $\sigma(X)$  and  $\sigma(Y)$  (cf. definition 2.1) and the definition of indepen-  
 1354 dence of two families of events (cf. [8]),  $\sigma(X)$  and  $\sigma(Y)$  are independent iff

$$1355 \quad \mathbb{P}(X^{-1}(A) \cap Y^{-1}(B)) = \mathbb{P}(X^{-1}(A)) \cdot \mathbb{P}(Y^{-1}(B))$$

1356 holds for all  $A \in \mathcal{F}_{\mathcal{X}}, B \in \mathcal{F}_{\mathcal{Y}}$ .<sup>19</sup> Using that

$$\begin{aligned} 1357 \quad & X^{-1}(A) \cap Y^{-1}(B) \\ 1358 \quad & = \{\omega \in \Omega \mid X(\omega) \in A\} \cap \{\omega \in \Omega \mid Y(\omega) \in B\} \\ 1359 \quad & = \{\omega \in \Omega \mid X(\omega) \in A, Y(\omega) \in B\} \end{aligned}$$

1360 holds and that  $\{X \in A, Y \in B\}$  is just a short form for the latter set, together with  
 1361 analog arguments for  $\{X \in A\}$  and  $\{Y \in B\}$ , we obtain equation (A.11).  $\square$

<sup>19</sup>By definition of a random variable,  $X$  is  $\mathcal{F}$ - $\mathcal{F}_{\mathcal{X}}$ - and  $Y$  is  $\mathcal{F}$ - $\mathcal{F}_{\mathcal{Y}}$ -measurable, i.e., for all  $A \in \mathcal{F}_{\mathcal{X}}$ ,  $X^{-1}(A) \in \mathcal{F}$  and for all  $B \in \mathcal{F}_{\mathcal{Y}}$ ,  $Y^{-1}(B) \in \mathcal{F}$  holds. Therefore, the considered probabilities are well defined ( $\mathbb{P}$  is a function defined on  $\mathcal{F}$ ).

1362 **Lemma A.8** (Independence of two random variables, version 2).

1363 Assume that  $\mathcal{F}_X = \sigma(\mathcal{E}_X)$  and  $\mathcal{F}_Y = \sigma(\mathcal{E}_Y)$  holds and that the set systems  $\mathcal{E}_X$  and  $\mathcal{E}_Y$ , also  
 1364 called generators, are  $\cap$ -stable<sup>20</sup>. Then  $X$  and  $Y$  are independent with respect to  $\mathbb{P}$  iff

$$1365 \quad \mathbb{P}(X \in A, Y \in B) = \mathbb{P}(X \in A) \cdot \mathbb{P}(Y \in B) \quad (\text{A.12})$$

1366 holds for all  $A \in \mathcal{E}_X, B \in \mathcal{E}_Y$ .

1367 *Proof.* By definition 2.1,  $X$  and  $Y$  are independent iff  $\sigma(X)$  and  $\sigma(Y)$  are independent.  
 1368 By definition of these  $\sigma$ -fields (cf. definition 2.1), then  $X$  and  $Y$  are independent iff  
 1369  $X^{-1}(\sigma(\mathcal{E}_X))$  and  $Y^{-1}(\sigma(\mathcal{E}_Y))$  are independent. By lemma A.5,  $X^{-1}(\sigma(\mathcal{E}_X)) = \sigma(X^{-1}(\mathcal{E}_X))$   
 1370 and  $Y^{-1}(\sigma(\mathcal{E}_Y)) = \sigma(Y^{-1}(\mathcal{E}_Y))$  holds. Therefore,  $X$  and  $Y$  are independent iff  $\sigma(X^{-1}(\mathcal{E}_X))$   
 1371 and  $\sigma(Y^{-1}(\mathcal{E}_Y))$  are independent.

1372 For the latter case, using that a probability measure  $\mathbb{P}$  is uniquely determined by an  
 1373  $\cap$ -stable generator of the  $\sigma$ -field it is defined on (cf. [23], lemma 1.42), it suffices to test  
 1374 equation (A.11) on  $X^{-1}(\mathcal{E}_X)$  and  $Y^{-1}(\mathcal{E}_Y)$ , respectively, as these are intersection stable if  
 1375  $\mathcal{E}_X$  and  $\mathcal{E}_Y$  are.  $\square$

1376 *Remark A.9* ( $\cap$ -stable generators are enough). If  $\cap$ -stable generators  $\mathcal{E}_X$  and  $\mathcal{E}_Y$  of the  
 1377  $\sigma$ -fields  $\mathcal{F}_X$  and  $\mathcal{F}_Y$ , respectively, are known, the following lemmata A.10 and A.12 are  
 1378 replaceable by a version where the  $\sigma$ -fields  $\mathcal{F}_X$  and  $\mathcal{F}_Y$  are replaced by their generators  
 1379  $\mathcal{E}_X$  and  $\mathcal{E}_Y$ , such as we did in lemma A.8 based on lemma A.7.

1380 **Lemma A.10** (Independence of two random variables, version 3).

1381  $X$  and  $Y$  are independent with respect to  $\mathbb{P}$  iff

$$1382 \quad \mathbb{P}(X \in A) = \mathbb{P}(X \in A \mid Y \in B) \quad (\text{A.13})$$

1383 holds for all  $A \in \mathcal{F}_X$  and  $B \in \mathcal{F}_Y$  for which  $\mathbb{P}(Y \in B) > 0$  holds.

1384 *Proof.* For  $A \in \mathcal{F}_X$  and  $B \in \mathcal{F}_Y$  for which  $\mathbb{P}(Y \in B) > 0$  holds, by definition of conditional  
 1385 probabilities (cf. [8]),  $\mathbb{P}(X \in A, Y \in B) = \mathbb{P}(X \in A \mid Y \in B) \cdot \mathbb{P}(Y \in B)$  holds.  
 1386 Comparing equation (A.12) and (A.13) yields both implications, noting that for the case  
 1387  $\mathbb{P}(Y \in B) = 0$ , equation (A.12) is trivially fulfilled (cf. remark A.11).  $\square$

1388 *Remark A.11.* Conditional probabilities of the kind  $\mathbb{P}(X \in A \mid Y \in B)$  are only well-  
 1389 defined for  $B \in \mathcal{F}_Y$  for which  $\mathbb{P}(Y \in B) > 0$  holds. However, equation (A.11) is also  
 1390 satisfied for  $B \in \mathcal{F}_Y$  for which  $\mathbb{P}(Y \in B) = 0$  holds, because due to rules of (probability)  
 1391 measures,  $0 \leq \mathbb{P}(X \in A, Y \in B) \leq \mathbb{P}(Y \in B) = 0$  and therefore,  $\mathbb{P}(X \in A, Y \in B) = 0$   
 1392 holds.

1393 While the results of the previous lemmata are well-known observations, we need a slightly  
 1394 different characterization of independence of random variables than usual to link it to  
 1395 group fairness notions in ML.

1396 **Lemma A.12** (Independence of two random variables, version 4).

1397  $X$  and  $Y$  are independent with respect to  $\mathbb{P}$  iff

$$1398 \quad \mathbb{P}(X \in A \mid Y \in B_1) = \mathbb{P}(X \in A \mid Y \in B_2) \quad (\text{A.14})$$

1399 holds for all  $A \in \mathcal{F}_X$  and  $B_1, B_2 \in \mathcal{F}_Y$  for which  $\mathbb{P}(Y \in B_1), \mathbb{P}(Y \in B_2) > 0$  holds.

<sup>20</sup>A set system  $\mathcal{E}$  is called  $\cap$ -stable iff for any two sets  $A_1, A_2 \in \mathcal{E}$ , also  $A_1 \cap A_2 \in \mathcal{E}$  holds.

1400 *Proof.* If  $X$  and  $Y$  are independent with respect to  $\mathbb{P}$ , equation (A.14) clearly holds for  
 1401 all  $A \in \mathcal{F}_X$  and  $B_1, B_2 \in \mathcal{F}_Y$  for which  $\mathbb{P}(Y \in B_1), \mathbb{P}(Y \in B_2) > 0$  holds by lemma A.10.

1402  
 1403 Vice versa, if equation (A.14) holds for all  $A \in \mathcal{F}_X$  and  $B_1, B_2 \in \mathcal{F}_Y$  for which  $\mathbb{P}(Y \in$   
 1404  $B_1), \mathbb{P}(Y \in B_2) > 0$  holds, we prove that  $X$  and  $Y$  are independent with respect to  $\mathbb{P}$   
 1405 using lemma A.10 as well. To do so, let  $A \in \mathcal{F}_X$  and  $B \in \mathcal{F}_Y$  for which  $\mathbb{P}(Y \in B) > 0$   
 1406 holds.

1407 *Case 1:* If  $\mathbb{P}(Y \in B) = 1$  holds, by (1) rules of (probability) measures and (2) the  
 1408 definition of conditional probabilities, we obtain

$$1409 \quad 0 \stackrel{(1)}{\leq} \mathbb{P}(X \in A, Y \in B^C) \stackrel{(1)}{\leq} \mathbb{P}(Y \in B^C) \stackrel{(1)}{=} 1 - \mathbb{P}(Y \in B) = 0, \text{ and therefore,}$$

1410

$$1411 \quad \mathbb{P}(X \in A) \stackrel{(1)}{=} \mathbb{P}(X \in A, Y \in B) + \underbrace{\mathbb{P}(X \in A, Y \in B^C)}_{=0}$$

$$1412 \quad \stackrel{(2)}{=} \mathbb{P}(X \in A | Y \in B) \cdot \underbrace{\mathbb{P}(Y \in B)}_{=1}$$

$$1413 \quad = \mathbb{P}(X \in A | Y \in B).$$

1414 *Case 2:* If  $0 < \mathbb{P}(Y \in B) < 1$  holds, by definition of a  $\sigma$ -field,  $B^C \in \mathcal{F}_Y$  and by the  
 1415 assumption of  $\mathbb{P}(Y \in B) < 1, \mathbb{P}(Y \in B^C) > 0$  holds. Then, the following conditional  
 1416 probabilities are well-defined and we can use equation (A.14): By (1) rules of (probability)  
 1417 measures, (2) the definition of conditional probabilities and (3) this equation (A.14), we  
 1418 obtain

$$1419 \quad \mathbb{P}(X \in A) \stackrel{(1)}{=} \mathbb{P}(X \in A, Y \in B) + \mathbb{P}(X \in A, Y \in B^C)$$

$$1420 \quad \stackrel{(2)}{=} \mathbb{P}(X \in A | Y \in B) \cdot \mathbb{P}(Y \in B) + \mathbb{P}(X \in A | Y \in B^C) \cdot \mathbb{P}(Y \in B^C)$$

$$1421 \quad \stackrel{(3)}{=} (\mathbb{P}(Y \in B) + \mathbb{P}(Y \in B^C)) \cdot \mathbb{P}(X \in A | Y \in B)$$

$$1422 \quad \stackrel{(1)}{=} \mathbb{P}(X \in A | Y \in B). \quad \square$$

## 1423 B Additional Experimental Results and Analysis

1424 In this section, we present further detailed findings regarding the comparison of all the  
 1425 methods introduced in subsection 4.1.2.

1426

1427 *Increasing fairness:* In figure B.1, we see the extension of figure 5 for the missing trained  
 1428 ensemble classifiers.

1429 We see that for all fairness-enhancing methods and all leakage sizes, the fairness-enhancing  
 1430 methods on average increase fairness while on average decreasing accuracy by the same or  
 1431 even a smaller amount compared to their corresponding baseline methods. For  $d = 5$ , all  
 1432 fairness-enhancing methods allow a large range of fairness improvement at cost of a small  
 1433 range of accuracy, which is only due to the relatively poor accuracy of the leakage detection  
 1434 in this scenario in general. Also for  $d = 15$  and the TFPR- and the ACC-methods with  
 1435 log-barrier function, the range of fairness is larger than the range of accuracy. However, a  
 1436 perfect fairness score of disparate impact being equal to one can not be achieved by these  
 1437 methods. Such result usually comes along with a low accuracy and would increase the

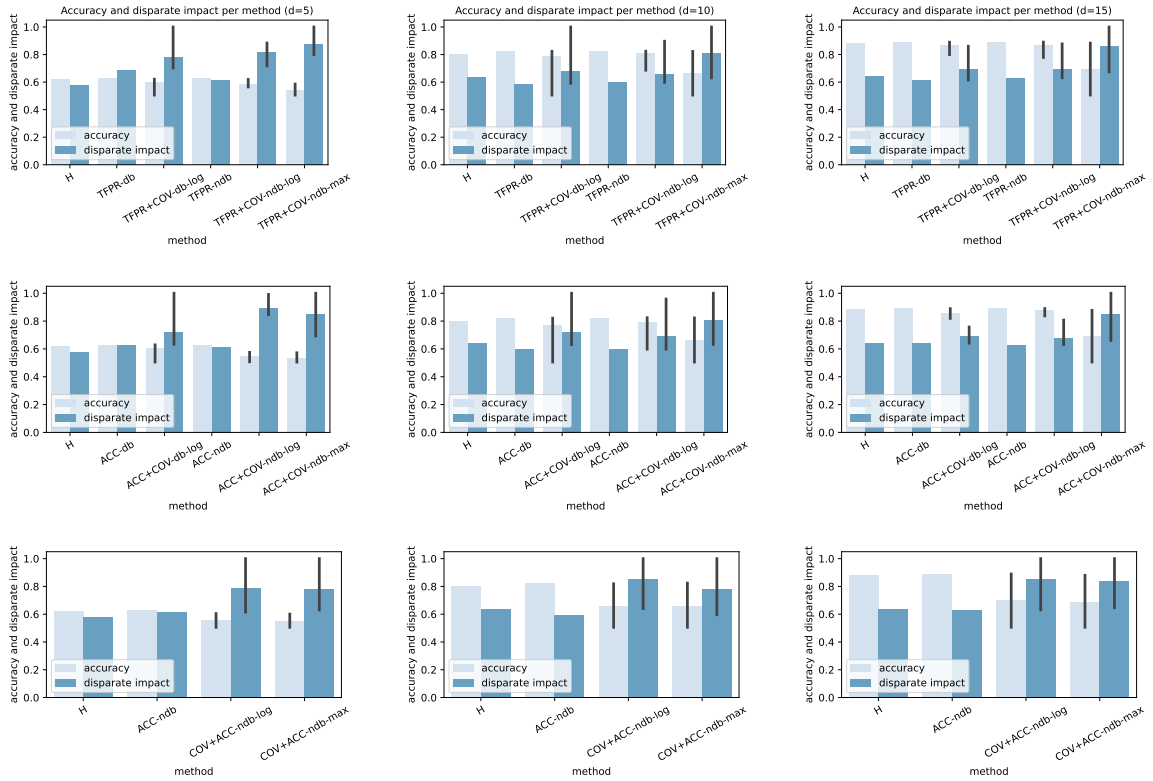

Figure B.1: Accuracy and disparate impact score per method and leakage diameter in the Hanoi-WDS as well as for different hyperparameters  $c$  or  $\lambda$ .

1438 accuracy range, as we will see later. For the other scenarios, the ranges of fairness and  
 1439 accuracy are mostly similarly large. Thus, overall, one can say that fairness and overall  
 1440 performance are mutually dependent to about the same extent.

1441 In figure B.2, we see the extension of figure 6 for the missing trained ensemble classifiers.  
 1442 The results do not differ significantly compared to figure 6.

1443

1444 *The coherence of fairness and overall performance:* In figure B.3, we see the extension of  
 1445 figure 7 for the missing trained ensemble classifier.

1446 Based on our discussions in subsection 3.4, we investigate into the different methods also  
 1447 within the chosen subcategories:

1448 For the TFPR-methods, the methods using the log-barrier yield better results in the  
 1449 sense that their pareto fronts lie above the one using the max-penalty. However, the  
 1450 max-penalty method allows the most fine-grained score combinations, followed by the  
 1451 non-differentiable log-barrier method. As the latter nevertheless allows a disparate impact  
 1452 score larger than 0.8 with a better or similar accuracy score compared to the other TFPR-  
 1453 methods, the TFPR+COV-ndb-log-method is the best performing method among all  
 1454 TFPR-methods.

1455 For the ACC-methods, we observe similar results except that for  $d = 10$ , the ACC+COV-  
 1456 ndb-log-method even allows the most fine-grained score combinations.

1457 For the COV-methods, the log-barrier method also performs better than the max-penalty  
 1458 method in terms of the position of the pareto-front, but also exhibits some score combi-  
 1459 nations apart from the pareto-front due to non-convexity of the OP. The non-convexity  
 1460 problem mostly appears for  $d = 5$ . Nevertheless, as both methods allow fine-grained

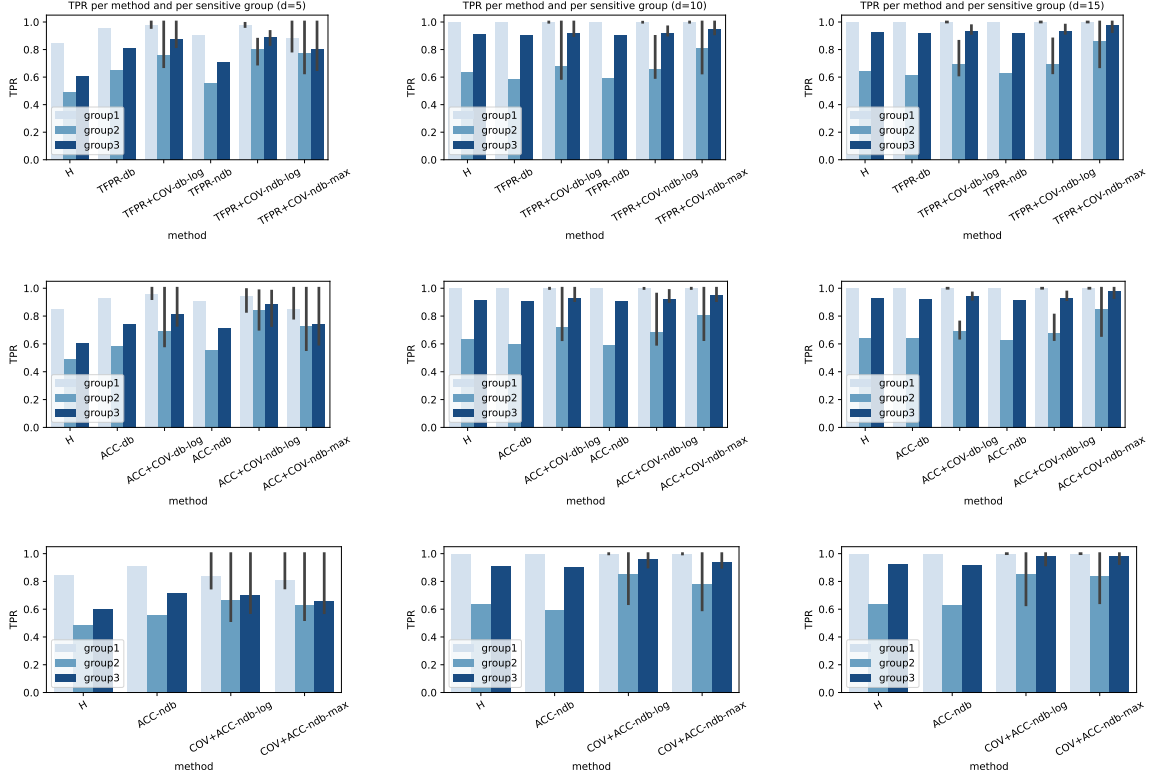

Figure B.2: TPR per method, group and leakage diameter in the Hanoi-WDS as well as for different hyperparameters  $c$  or  $\lambda$ .

1461 score combinations, the COV+ACC-ndb-log-method outperforms the COV+ACC-ndb-  
 1462 max-method.

1463 In contrast, for the DI-methods, both log-barrier and max-penalty method provide sim-  
 1464 ilarly good pareto-fronts. However, as the max-penalty method allows a little less score  
 1465 combinations apart from the pareto-front and a little more fine-grained score combina-  
 1466 tions, the DI+ACC-ndb-max-method outperforms the DI+ACC-ndb-log-method.

1467 Also overall, the DI+ACC-ndb-max-method provides the best results: The pareto-front  
 1468 has one of the best shapes (coming closest to the optimal score combination of  $(DI, ACC) =$   
 1469  $(1, 1)$ ) and is finest-grained while having only a few combinations apart from its curve.

1470 By that, although for all other subcategories, the log-barrier delivers better results, the  
 1471 best method uses the max-penalty, yielding no clear winner of both of them (cf. paragraph  
 1472 “Algorithmic choices” in subsection 4.1.2). Nevertheless, a large advantage of the max-  
 1473 penalty is the easy choice of the hyperparameter  $\mu$ : While in this case,  $\mu$  can be any  
 1474 large number (for us,  $\mu = 100$  works), for the log-barrier, the choice of  $\mu$  requires more  
 1475 finetuning (cf. table 4).

1476 In contrast, rather more obvious is the result that the non-differentiable methods tend  
 1477 to cause better results compared to the differentiable methods, yielding that the error  
 1478 we make when approximating the ensemble classifier is not compensated by the power of  
 1479 the differentiable optimization algorithm (cf. paragraph “Algorithmic choices” in subsec-  
 1480 tion 4.1.2). Another advantage of the non-differentiable methods are that there are less  
 1481 hyperparameters to choose from (cf. table 4).

1482 Overall, the result that the DI+ACC-ndb-max-method provides the best results aligns  
 1483 well with the fact that for this method, the choice of hyperparameters is easiest: While the

1484 hyperparameter  $\mu$  is easy to choose here as discussed above, also the hyperparameter  $\lambda$   
 1485 allows a better control of the fairness compared to the hyperparameter  $c$  as also elaborated  
 1486 above.

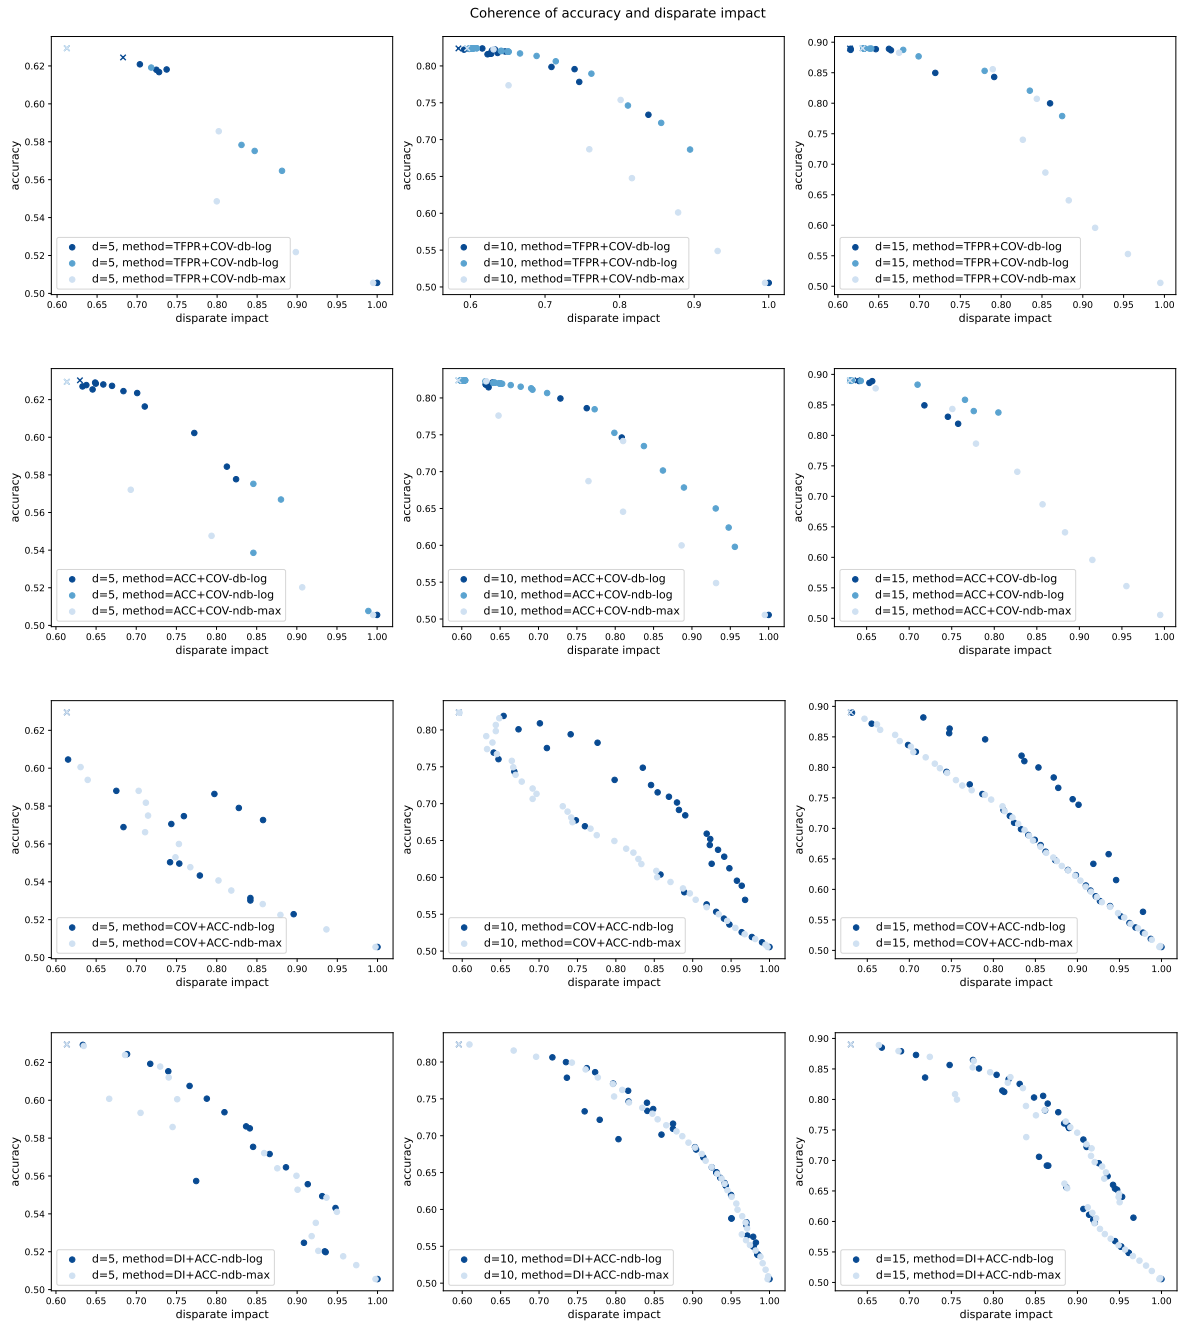

Figure B.3: Coherence of accuracy and disparate impact score for the different fairness-enhancing methods and different leakage sizes in the Hanoi-WDS, based on different hyperparameters  $c$  or  $\lambda$ . The cross data points visualize the accuracy and disparate impact score of the corresponding baselines methods (cf. paragraph “Explicit Methods” in subsection 4.1.2 or table 4).
